# Supplementary material for: Using Anti-Malondialdehyde Modified Peptide Autoantibodies to Import Machine Learning for Predicting Coronary Artery Stenosis in Taiwanese Patients with Coronary Artery Disease
Source: MDPI journal article supplement (doi:10.3390/diagnostics11060961), 2021-05-26
Supplement: s1 [file s1]

## Supplementary Materials

**Supplementary Table S1.** the baseline characteristic table for HCs and patients with CAD with <30% stenosis rate versus patients with CAD with 30%~70% and >70% stenosis rate.

| Characteristics                           | HC and < 30%<br>( <i>n</i> = 86) | 30%~70% + > 70%<br>( <i>n</i> = 126) |
|-------------------------------------------|----------------------------------|--------------------------------------|
| Age, years                                | 51.48 ± 16.07                    | 62.67 ± 9.43                         |
| Gender, male                              | 55(63%)                          | 93(73%)                              |
| Used to smoke                             | 16(18%)                          | 27(21%)                              |
| Current smoke                             | 15(17%)                          | 38(30%)                              |
| MDA                                       | 10.97 ± 4.51                     | 12.71 ± 7.15                         |
| MDA adduct                                | 0.21 ± 0.02                      | 0.29 ± 0.82                          |
| IgG anti A2M <sup>824-841</sup>           | 2.02 ± 3.66                      | 1.53 ± 1.6                           |
| IgG anti A2M <sup>824-841</sup> MDA       | 7.9 ± 12.71                      | 4.67 ± 2.68                          |
| IgG anti ApoB100 <sup>4022-4040</sup>     | 3.29 ± 6.87                      | 1.62 ± 1.1                           |
| IgG anti ApoB100 <sup>4022-4040</sup> MDA | 3.11 ± 9.66                      | 1.67 ± 2.62                          |
| IgG anti A1AT <sup>284-298</sup>          | 3.16 ± 5.61                      | 2.29 ± 1.83                          |
| IgG anti A1AT <sup>284-298</sup> MDA      | 3.75 ± 3.48                      | 3.61 ± 3.63                          |
| IgG anti IGKC <sup>76-99</sup>            | 2.22 ± 3.03                      | 1.71 ± 3.19                          |
| IgG anti IGKC <sup>76-99</sup> MDA        | 2.71 ± 4.77                      | 1.4 ± 1.24                           |
| IgM anti A2M <sup>824-841</sup>           | 0.8 ± 0.45                       | 0.59 ± 0.39                          |
| IgM anti A2M <sup>824-841</sup> MDA       | 1.68 ± 1.09                      | 1.25 ± 0.9                           |
| IgM anti ApoB100 <sup>4022-4040</sup>     | 1.22 ± 0.8                       | 1.1 ± 1.13                           |
| IgM anti ApoB100 <sup>4022-4040</sup> MDA | 1.18 ± 0.81                      | 0.93 ± 0.83                          |
| IgM anti A1AT <sup>284-298</sup>          | 1.14 ± 1.11                      | 1.01 ± 2.19                          |
| IgM anti A1AT <sup>284-298</sup> MDA      | 1.01 ± 0.53                      | 0.68 ± 0.43                          |
| IgM anti IGKC <sup>76-99</sup>            | 2.24 ± 5.61                      | 5.52 ± 40.03                         |
| IgM anti IGKC <sup>76-99</sup> MDA        | 0.63 ± 0.53                      | 0.42 ± 0.35                          |

\* Mean ± SD for continuous variables, and *n* (%) for categorical variables.

**Supplementary Table S2.** The AUC value of each single antibody with a 95% confidence interval.

| Variables            | AUC (95% C.I.)   |
|----------------------|------------------|
| IgG anti-A2M         | 0.52 (0.40–0.65) |
| IgG anti-A2M MDA     | 0.61 (0.49–0.72) |
| IgG anti-ApoB100     | 0.64 (0.52–0.75) |
| IgG anti-ApoB100 MDA | 0.59 (0.48–0.70) |
| IgG anti-A1AT        | 0.52 (0.40–0.65) |
| IgG anti-A1AT MDA    | 0.58 (0.45–0.71) |
| IgG anti-IGKC        | 0.57 (0.45–0.69) |
| IgG anti-IGKC MDA    | 0.66 (0.55–0.77) |
| IgM anti-A2M         | 0.73 (0.63–0.84) |
| IgM anti-A2M MDA     | 0.73 (0.63–0.84) |
| IgM anti-ApoB100     | 0.64 (0.53–0.75) |
| IgM anti-ApoB100 MDA | 0.70 (0.59–0.81) |
| IgM anti-A1AT        | 0.74 (0.65–0.84) |
| IgM anti-A1AT MDA    | 0.83 (0.75–0.91) |
| IgM anti-IGKC        | 0.70 (0.59–0.81) |
| IgM anti-IGKC MDA    | 0.78 (0.69–0.87) |

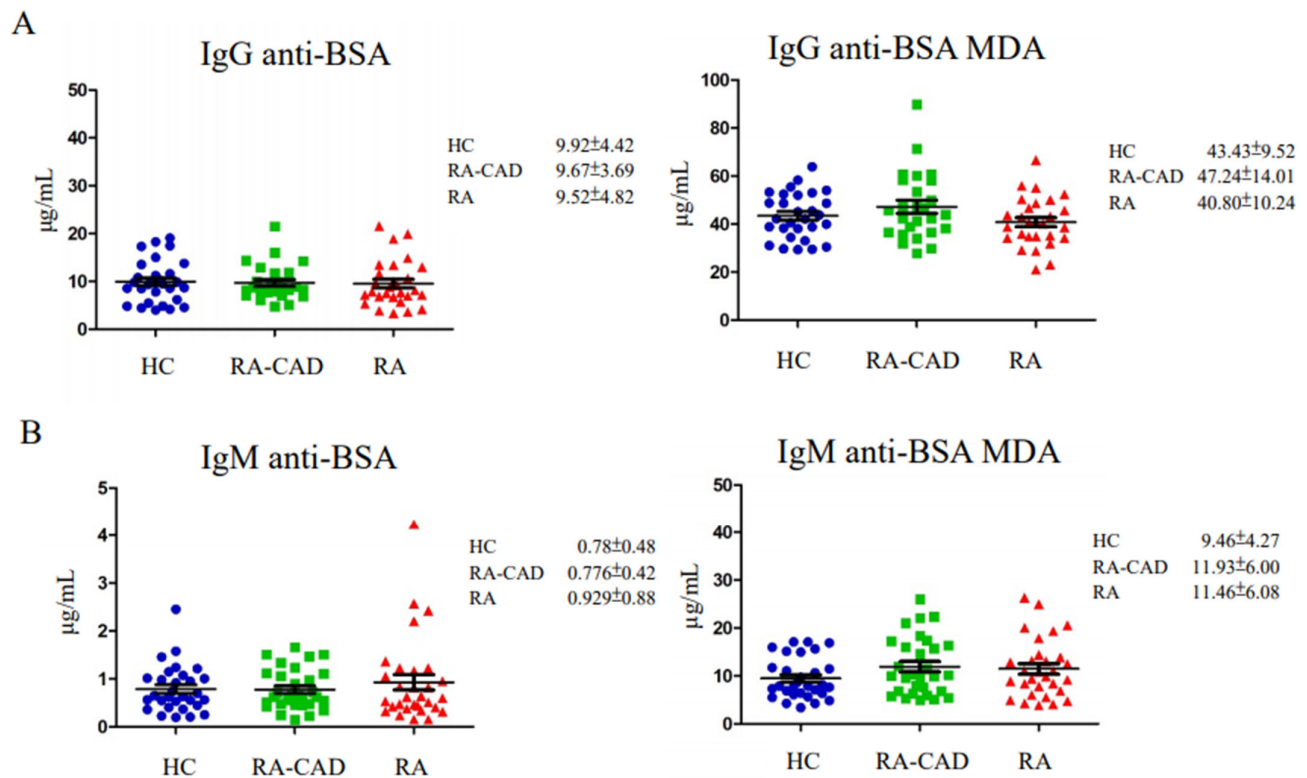

**Supplementary Figure S1.** Dot plots of plasma concentrations of autoantibody isotypes: immunoglobulin G (IgG) anti-bovine serum albumin (BSA) vs. IgG anti-BSA malondialdehyde (MDA) (A), and IgM anti-BSA vs. IgM anti-BSA MDA (B) in healthy controls (HCs), patients with rheumatoid arthritis (RA) and coronary artery disease (CAD), and patients with RA. Concentrations of antibody isotypes were calculated from calibration curves.

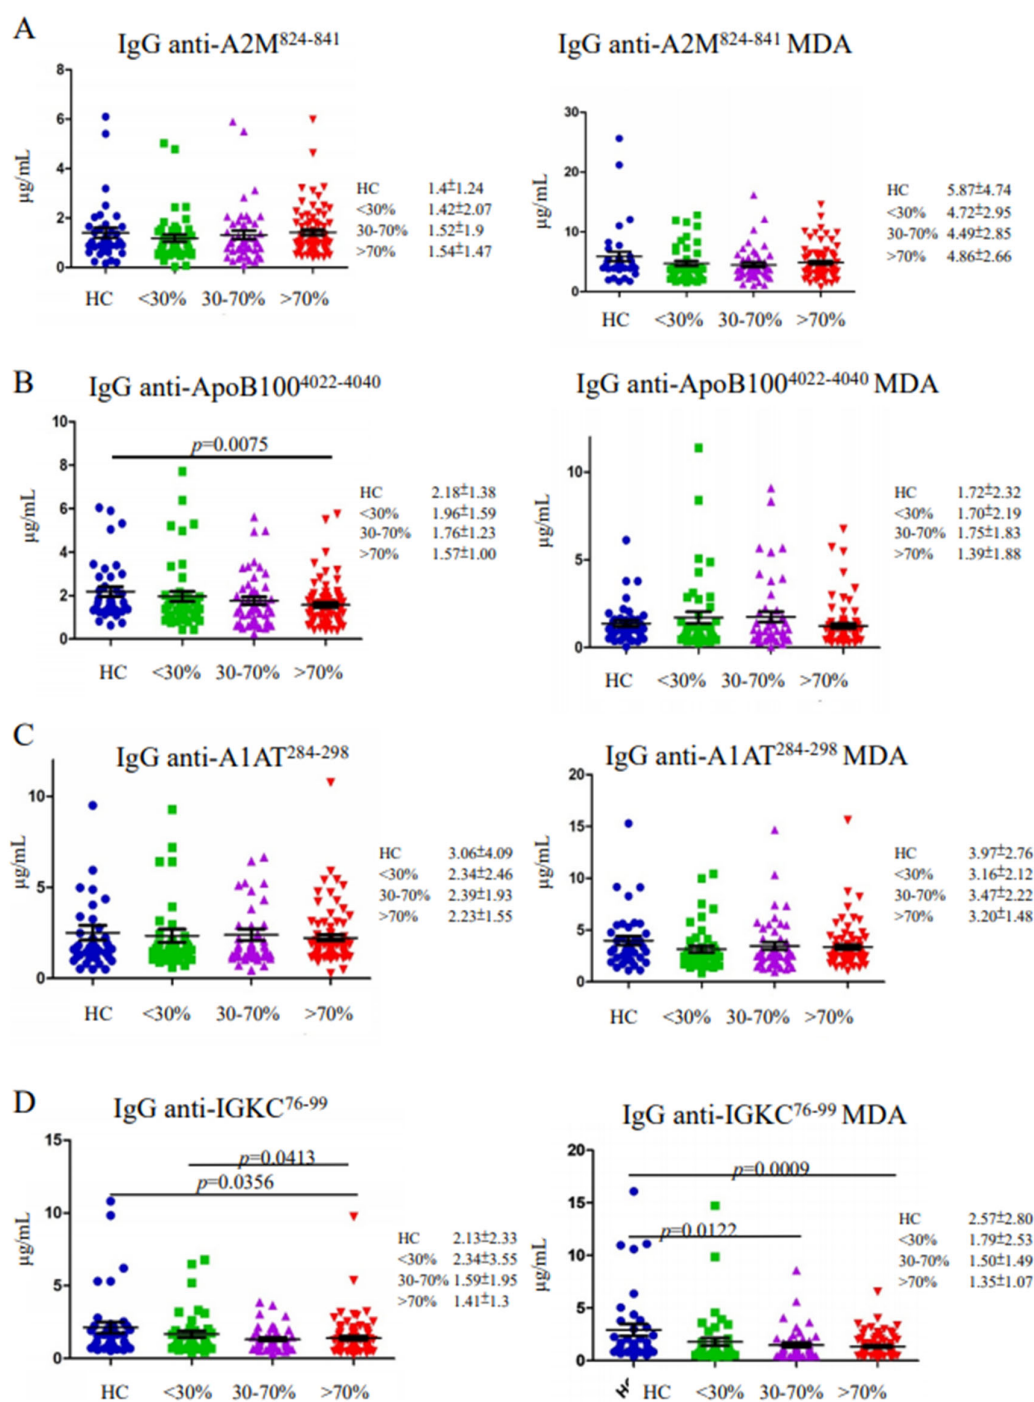

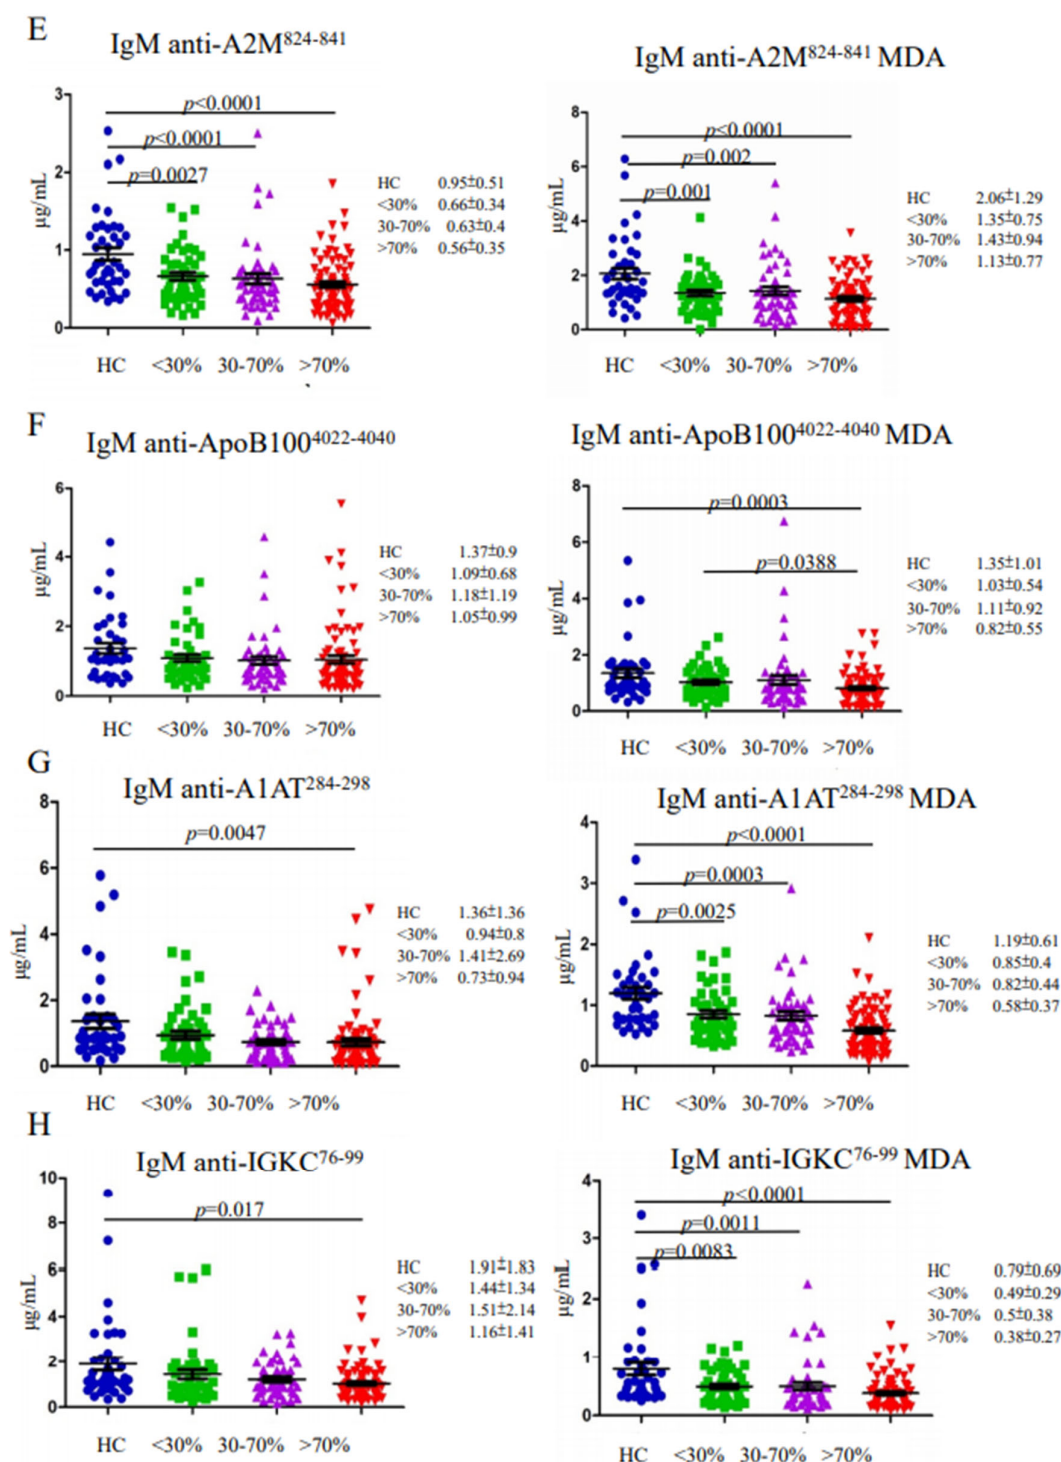

**Supplementary Figure S2.** Dot plots of plasma concentrations of autoantibody isotypes: immunoglobulin G (IgG) anti-alpha-2-macroglobulin (A2M)<sup>824-841</sup> vs. IgG anti-A2M<sup>824-841</sup> malondialdehyde (MDA) (A), IgG anti-apolipoprotein B-100 (ApoB100)<sup>4022-4040</sup> vs. IgG anti-ApoB100<sup>4022-4040</sup> MDA (B), IgG anti-alpha-1-antitrypsin (A1AT)<sup>284-298</sup> vs. IgG anti-A1AT<sup>284-298</sup> MDA (C), IgG anti-Ig kappa chain C region (IGKC<sup>76-99</sup>) vs. IgG anti-IGKC<sup>76-99</sup> MDA (D), IgM anti-A2M<sup>824-841</sup> vs. IgM anti-A2M<sup>824-841</sup> MDA (E), IgM anti-ApoB100<sup>4022-4040</sup> vs. IgM anti-ApoB100<sup>4022-4040</sup> MDA (F), IgM anti-A1AT<sup>284-298</sup> vs. IgM anti-A1AT<sup>284-298</sup> MDA (G), and IgM anti-IGKC<sup>76-99</sup> vs. IgM anti-IGKC<sup>76-99</sup> MDA (H) in healthy controls (HCs), and coronary artery disease (CAD) patients with <30%, 30%~70%, and >70% stenosis rates using an ELISA. Concentrations of antibody isotypes were calculated from calibration curves.

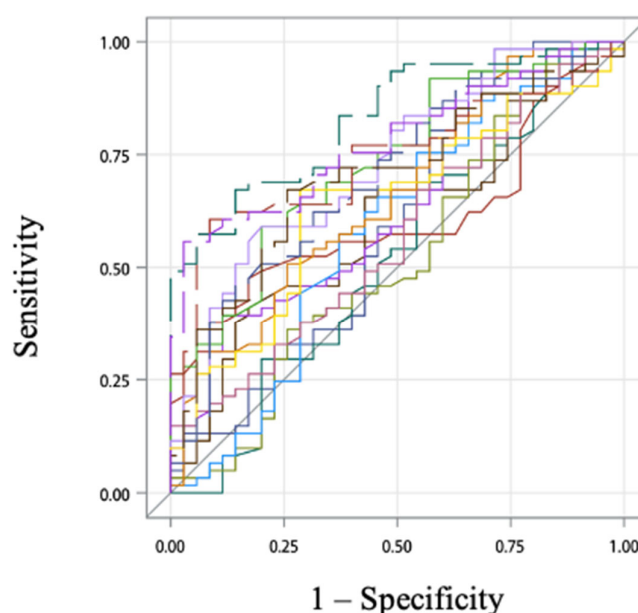

**Supplementary Figure S3:** The comparison of ROC curve analysis in each autoantibody.

## Supplementary Information

### 1. Supplementary Methods

#### 1.1. Thiobarbituric Acid-Reactive Substance (TBARS) Assay for Malondialdehyde (MDA) Detection

Plasma (10  $\mu$ L) was mixed with a TBARS solution containing 15% (*w/v*) trichloroacetic acid, 0.38% (*w/v*) thiobarbituric acid, and 0.25 N hydrochloric acid (HCl). The mixture was heated to 100  $^{\circ}$ C for 30 min and then cooled on ice for 2 min. After centrifugation, the supernatant was transferred to a plastic plate to measure the absorbance at 535 nm. Interpolation was conducted with MDA to determine the MDA concentration in plasma samples.

#### 1.2. Enzyme-Linked Immunosorbent Assay (ELISA) for Quantification of Plasma MDA-Protein Adducts

Diluted plasma samples (10  $\mu$ g/mL; 100  $\mu$ L) or MDA-modified bovine serum albumin (BSA; A7906, Sigma) standards (0–10  $\mu$ g/mL) were added to a flat-bottomed 96-well plate and incubated at 37  $^{\circ}$ C for 2 h. A 3% BSA solution was used for blocking at room temperature for 1 h after washing the plates with phosphate-buffered saline (PBS) containing 0.05% Tween 20 (PBST). The plates were washed with PBST, and a goat anti-MDA antibody (MBS316059, 1:1000, MyBioSource) was added and incubated at room temperature for 2 h. We washed the plates with PBST, added mouse anti-goat antibody-horseradish peroxidase (HRP; sc2354, 1:10,000, Santa Cruz), and incubated the plates at room temperature for 1 h. After washing the plates, we detected the antibody-HRP with SureBlue Reserve™ TMB Microwell Peroxidase Substrate (Kirkegaard & Perry Laboratories, Gaithersburg, MD, USA) and then incubated the plates at room temperature for 30 min. After the color reaction was stopped with 1 N HCl, the absorbance was measured at 450/620 nm. We measured MDA-protein adducts in plasma according to a standard MDA-modified BSA curve. Amounts of MDA-protein adducts are expressed as  $\mu$ g/mL.

#### 1.3. Detection of Autoantibodies against Unmodified and MDA-Modified BSA and Peptides

BSA and four peptides (1 mg/mL) were modified with 0.5 M MDA at 37 °C for 3 h. BSA and peptides (10 µg/mL) were adsorbed in a flat-bottom 96-well plate and incubated at 4 °C overnight. After washing with PBST, 3% BSA was used for blocking. Plates were washed with PBST, and we then added 100-fold diluted plasma and incubated the plates at room temperature for 2 h. After washing the plates, we used rabbit anti-human IgG-HRP (A80-118P, 1:30,000, BETHYL) or rabbit anti-human IgM-HRP (A0420, 1:10,000, Sigma) to detect the autoantibodies against unmodified or MDA-modified peptides at room temperature for 1 h. The antibody-HRP was reacted with the SureBlue Reserve™ TMB Microwell Peroxidase Substrate (Kirkegard & Perry Laboratories, USA) and incubated the plates at room temperature for 15 min. The color reaction was stopped with 1 N HCl, and the absorbance was measured at 450/620 nm. All ELISA experiments were conducted following the ELISA Guidebook [1]. Three sample controls including HCs, and CAD patients with 70% stenosis rates with two replicates were placed in each plate to calculate the percent coefficient of variation (CV%) across wells and plates. An experiment was repeated if the CV% was calculated to be >20%.

## References

1. Crowther, J. R. (2000). ELISA Guidebook, The. doi:10.1385/159259049
